# Supplementary material for: COVID-19 in health care workers – A systematic review and meta-analysis
Source: Elsevier journal article supplement (doi:10.1016/j.ajem.2020.05.113), 2020-06-06
Supplement: mmc1 [file mmc1.xls]

Wayback Machine


Ask the publishers to restore access to 500,000+ books.

Hamburger icon
An icon used to represent a menu that can be
toggled by interacting with this icon.

Internet Archive logo
A line drawing of the Internet Archive headquarters
building façade.

Web icon
An illustration of a computer
application window

Wayback Machine


Texts icon
An illustration of an open book.

Texts


Video icon
An illustration of two cells of a film
strip.

Video


Audio icon
An illustration of an audio speaker.

Audio


Software icon
An illustration of a 3.5" floppy
disk.

Software


Images icon
An illustration of two photographs.

Images


Donate icon
An illustration of a heart shape

Donate


Ellipses icon
An illustration of text ellipses.

More

Donate icon
An illustration of a heart shape

"Donate to the archive"


User icon
An illustration of a person's head and chest.


Sign up
|
Log in


Upload icon
An illustration of a horizontal line over an up
pointing arrow.

Upload


Search icon
An illustration of a magnifying glass.


Search icon
An illustration of a magnifying glass.


### Internet Archive Audio

Live Music
Archive

Librivox
Free Audio

#### Featured

- All Audio
- Grateful Dead
- Netlabels
- Old Time Radio
- 78 RPMs
  and Cylinder Recordings

#### Top

- Audio Books
  & Poetry
- Computers,
  Technology and Science
- Music, Arts
  & Culture
- News &
  Public Affairs
- Spirituality
  & Religion
- Podcasts
- Radio News
  Archive


### Images

Metropolitan Museum

Cleveland
Museum of Art

#### Featured

- All Images
- Flickr Commons
- Occupy Wall
  Street Flickr
- Cover Art
- USGS Maps

#### Top

- NASA Images
- Solar System
  Collection
- Ames Research
  Center


### Software

Internet
Arcade

Console Living Room

#### Featured

- All Software
- Old School
  Emulation
- MS-DOS Games
- Historical
  Software
- Classic PC
  Games
- Software
  Library

#### Top

- Kodi
  Archive and Support File
- Vintage
  Software
- APK
- MS-DOS
- CD-ROM
  Software
- CD-ROM
  Software Library
- Software Sites
- Tucows
  Software Library
- Shareware
  CD-ROMs
- Software
  Capsules Compilation
- CD-ROM Images
- ZX Spectrum
- DOOM Level CD


### Texts

Open Library

American
Libraries

#### Featured

- All Texts
- Smithsonian
  Libraries
- FEDLINK (US)
- Genealogy
- Lincoln
  Collection

#### Top

- American
  Libraries
- Canadian
  Libraries
- Universal
  Library
- Project
  Gutenberg
- Children's
  Library
- Biodiversity
  Heritage Library
- Books by
  Language
- Additional
  Collections


### Video

TV News

Understanding
9/11

#### Featured

- All Video
- Prelinger
  Archives
- Democracy Now!
- Occupy Wall
  Street
- TV NSA Clip
  Library

#### Top

- Animation
  & Cartoons
- Arts & Music
- Computers
  & Technology
- Cultural
  & Academic Films
- Ephemeral Films
- Movies
- News &
  Public Affairs
- Spirituality
  & Religion
- Sports Videos
- Television
- Videogame
  Videos
- Vlogs
- Youth Media


Search the history of over \_\_WB\_PAGES\_ARCHIVED\_\_
web pages
on the Internet.

Search the Wayback Machine

Search icon
An illustration of a magnifying
glass.

#### Mobile Apps

- Wayback Machine (iOS)
- Wayback Machine (Android)

#### Browser Extensions

- Chrome
- Firefox
- Safari
- Edge

#### Archive-It Subscription

- Explore the Collections
- Learn More
- Build Collections

### Save Page Now

Capture a web page as it appears now for use as a trusted
citation in the future.

Please enter a valid web address


- About
- Blog
- Projects
- Help
- Donate
- Contact
- Jobs
- Volunteer
- People


- Sign up for free
- Log in


Search metadata


Search text contents


Search TV news captions


Search radio transcripts


Search archived web sites

Advanced Search


- About
- Blog
- Projects
- Help
- Donate

  Donate icon
  An illustration of a heart shape
- Contact
- Jobs
- Volunteer
- People

DONATE

Latest
Show All

## Hrm.

The Wayback Machine has not archived that URL.

Click here to search for all archived pages under
https://www.ajemjournal.com/cms/10.1016/j.ajem.2020.05.113/attachment/17b90c4d-f47d-4792-817f-f2d375de8060/.

The Wayback Machine requires your browser to support JavaScript, please email info@archive.org  
if you have any questions about this.


The Wayback Machine is an initiative of the
Internet Archive,
a 501(c)(3) non-profit, building a digital library of
Internet sites and other cultural artifacts in digital form.
  
Other projects include
Open Library &
archive-it.org.

Your use of the Wayback Machine is subject to the Internet Archive's
Terms of Use.
